# Supplementary material for: Dietary Patterns and Prevalent NAFLD at Year 25 from the Coronary Artery Risk Development in Young Adults (CARDIA) Study
Source: MDPI journal article supplement (doi:10.3390/nu14040854), 2022-02-18
Supplement: s1 [file s1]

Supplemental Table S1: Comparison of included and excluded participants based on Year 25 exam attendance (*N* = 3498)

|                                                                    | Included<br><i>N</i> = 1726 | Excluded<br><i>N</i> = 1772 | <i>p</i> -value |
|--------------------------------------------------------------------|-----------------------------|-----------------------------|-----------------|
| Age (year), mean (SD)                                              | 50.16 (3.59)                | 50.16 (3.68)                | 0.99            |
| Women (%)                                                          | 998 (57.82)                 | 983 (55.47)                 | 0.16            |
| White (%)                                                          | 1031 (59.73)                | 827 (46.67)                 | <0.0001         |
| Socioeconomic status                                               |                             |                             |                 |
| Highest grade completed, mean (SD)                                 | 15.97 (2.51)                | 15.28 (2.59)                | <0.0001         |
| Income >\$50,000/year (%)                                          | 1229 (71.21)                | 1012 (59.04)                | <0.0001         |
| Access to medical care                                             |                             |                             |                 |
| Report regular medical care (%)                                    | 1598 (92.58)                | 1588 (89.62)                | 0.002           |
| Difficulty accessing healthcare (%) <sup>1</sup>                   | 169 (9.79)                  | 229 (13.11)                 | 0.002           |
| BMI (kg/m <sup>2</sup> ), mean (SD)                                | 29.62 (6.74)                | 30.71 (7.60)                | <0.0001         |
| Obese, BMI >30 (%)                                                 | 686 (39.75)                 | 836 (47.39)                 | <0.0001         |
| Waist circumference (cm), mean (SD)                                | 93.17 (15.31)               | 95.62 (16.40)               | <0.0001         |
| Glomerular filtration rate (mL/min/1.73m <sup>2</sup> ), mean (SD) | 94.55 (19.85)               | 98.51 (22.19)               | <0.0001         |
| Comorbidities (%)                                                  |                             |                             |                 |
| Hyperlipidemia <sup>2</sup>                                        | 411 (23.81)                 | 447 (25.51)                 | 0.24            |
| Hypertension <sup>3</sup>                                          | 600 (34.76)                 | 709 (40.08)                 | 0.001           |
| Diabetes mellitus <sup>4</sup>                                     | 211 (12.22)                 | 268 (15.25)                 | 0.01            |
| Metabolic syndrome <sup>5</sup>                                    | 310 (17.96)                 | 378 (21.33)                 | 0.01            |
| Alcohol use (g/day), median (IQR)                                  | 5.2 (15.2)                  | 0 (13.6 )                   | <0.0001         |
| Smoking (%)                                                        | 248 (14.37)                 | 341 (19.84)                 | <0.0001         |
| Physical activity (exercise units/week), median (IQR)              | 296 (358)                   | 258 (360)                   | <0.0001         |

<sup>1</sup> Responded “hard” or “very hard” in response to survey question “How hard is it to get needed health services?”. <sup>2</sup> Total cholesterol ≥240 mg/dl and/or lipid-lowering therapy. <sup>3</sup> Antihypertensive medication use and/or systolic blood pressure ≥140 mmHg or diastolic blood pressure ≥90 mmHg. <sup>4</sup> Fasting plasma glucose ≥126 mg/dl, treatment with insulin or hypoglycemic agent, 2-h post-challenge glucose ≥200 mg/dl and/or hemoglobin A1C ≥6.5%. <sup>5</sup> Defined using Adult Treatment Panel III criteria; SD: Standard Deviation. P-values from Chi-squared or t-tests/Wilcoxon.
